# Supplementary material
Source: Springer Nature journal article supplement (https://www.springermedizin.de/resource/supplementary/13058_2011_2974_MOESM13_ESM.pdf/9702984)

**A**

## Normal Breast - Healthy Individuals (n=29)

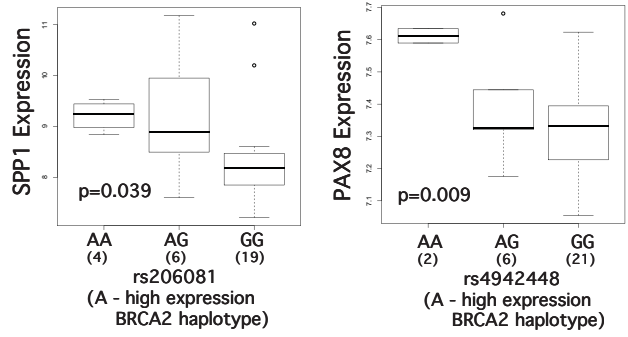

## Normal Breast - Breast Cancer Patients (n=144)

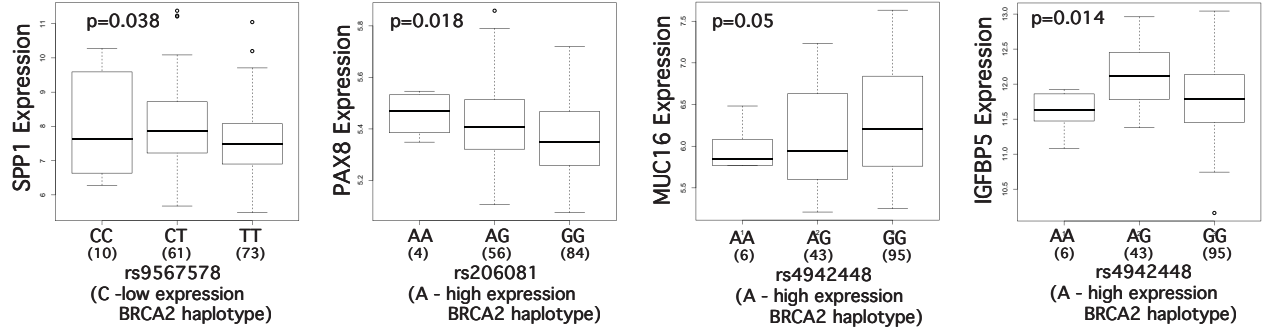**B**

## Blood - Healthy Individuals (n=20)

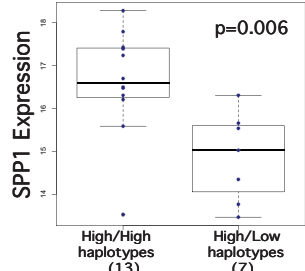

## Normal Breast - Breast Cancer patients (n=144)

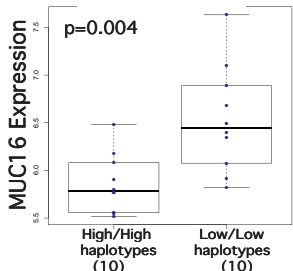

Supplement: MOESM13 [file 9702984]
